# Supplementary material for: Tumor-promoting macrophages prevail in malignant ascites of advanced gastric cancer
Source: PubMed Central journal article supplement (PMC8080575; doi:10.1038/s12276-020-00538-y), 2020-12-04
Supplement: 12276_2020_538_MOESM1_ESM.pdf [file 12276_2020_538_MOESM1_ESM.pdf]

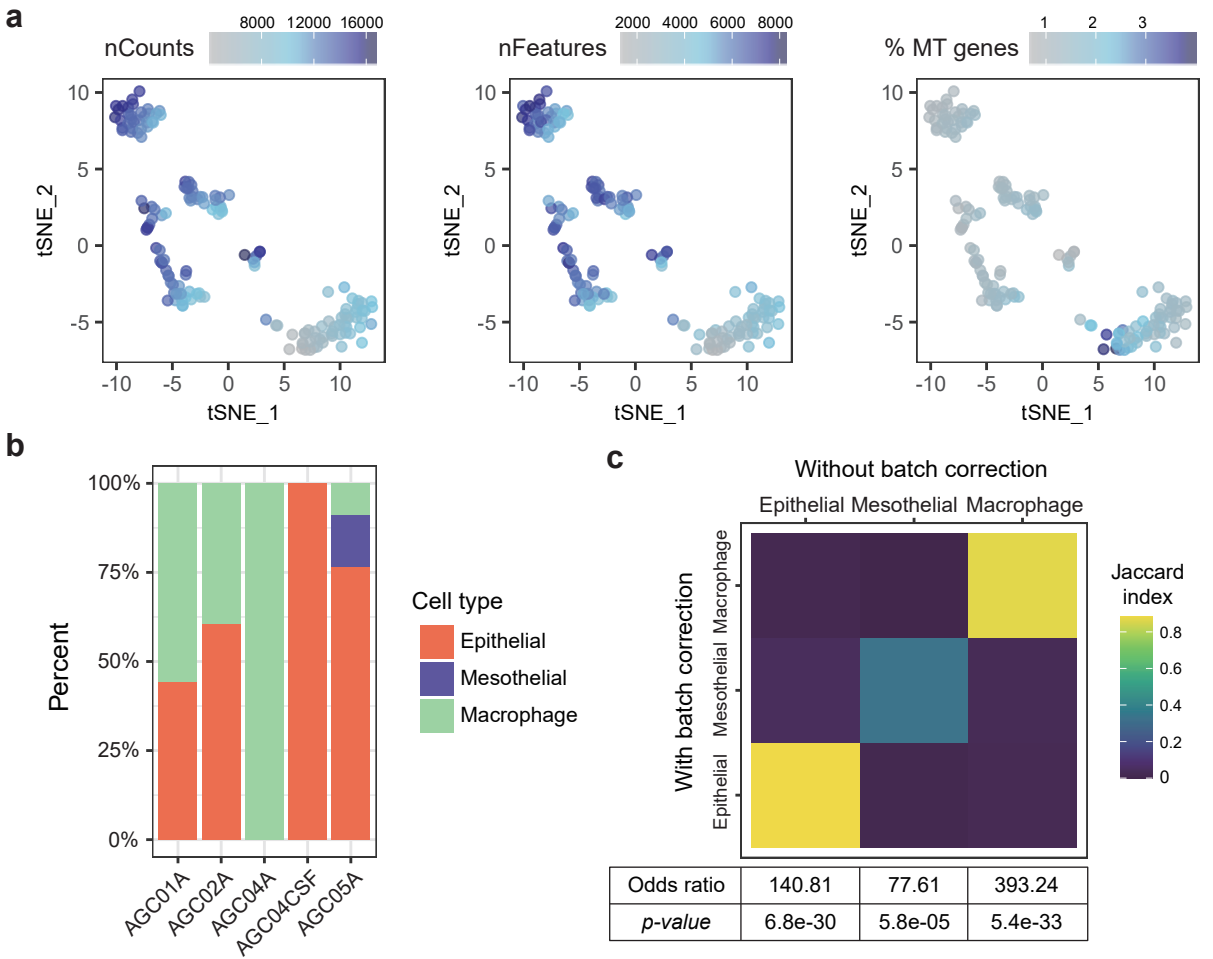

**Supplementary Fig. 1. Identification of tumor-associated macrophages and cancer cells.** **a** t-distributed stochastic neighbor embedding plots colored by nCounts, nFeatures, or percent of mitochondrial genes show no quality difference among samples. **b** Bar plot of cell type proportion in each sample. **c** Comparison of identified cell types with or without harmony batch correction. 2-D plot (upper) was colored by jaccard index. Odds ratio and *p*-value (lower) were calculated by Fisher's exact test.

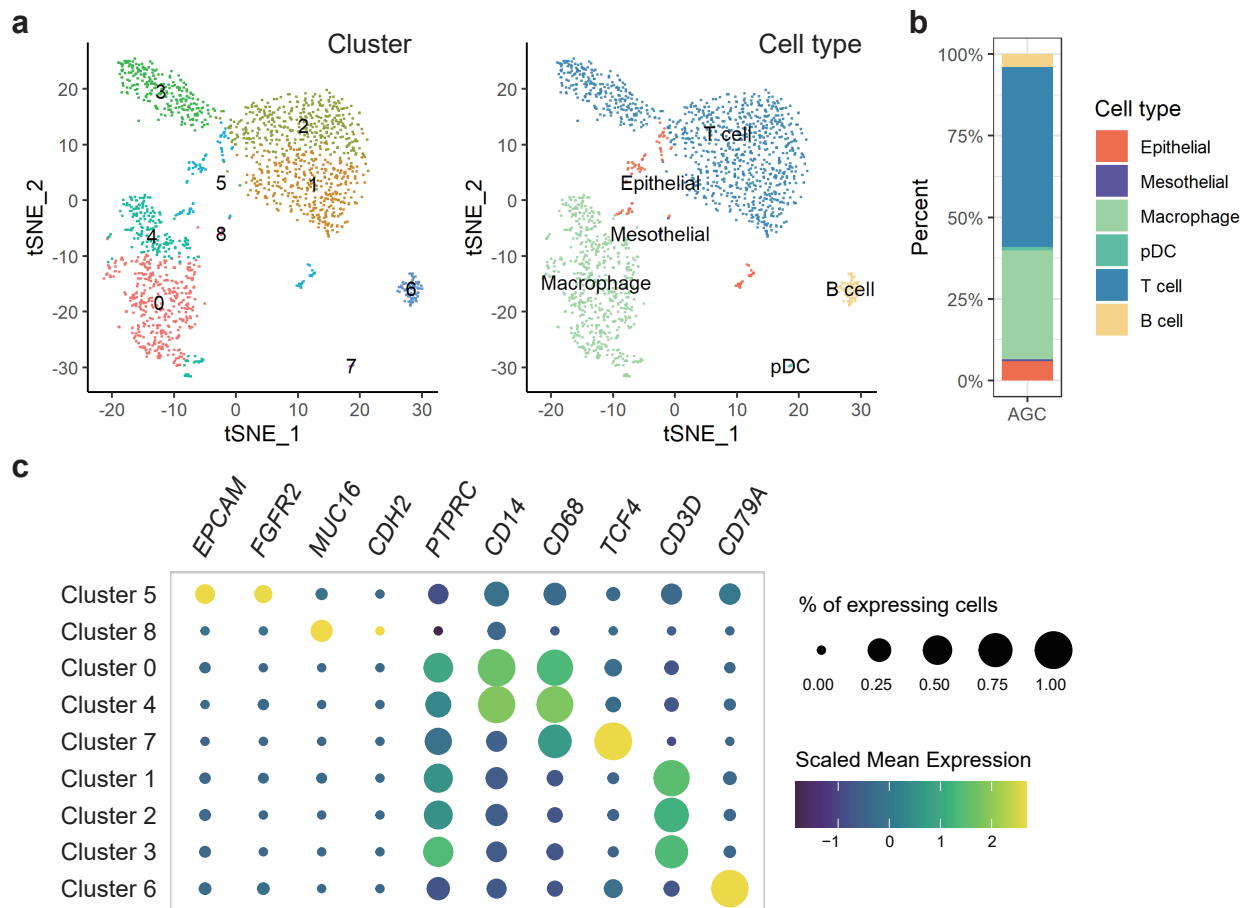

**Supplementary Fig. 2. Identification of cell types in malignant ascites of AGC04 (AGC04A) using massively parallel droplet-based method. a** t-distribute stochastic neighbor embedding plots colored by SNN cluster (left) or cell type (right). **b** Marker gene expression for epithelial cells, peritoneal mesothelial cells, mesenchymal cells, and macrophages in each cluster.

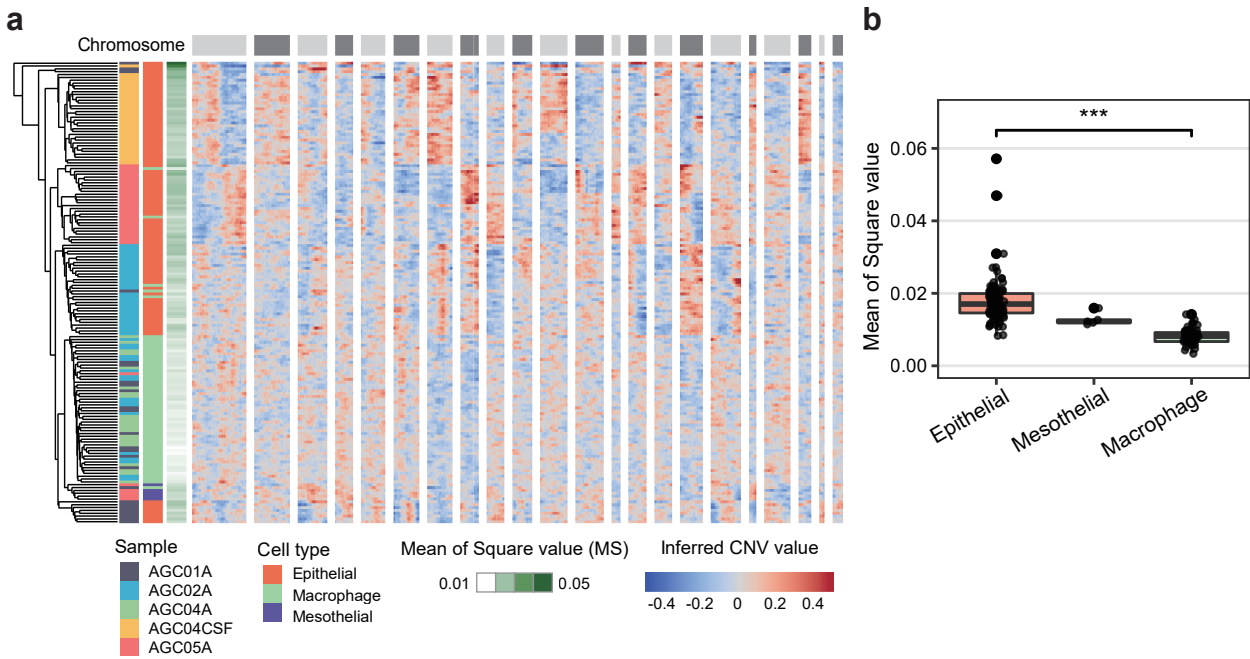

**Supplementary Fig. 3. Inferred chromosomal expression patterns of GC single cells.** **a** The chromosomal gene expression patterns (CEP) estimated from single-cell RNA-seq data. Each row represents single cells. Sample origin and defined cell type are annotated with colors on the left side. **b** Epithelial cells show higher variation in chromosomal expression patterns than mesothelial cells or macrophages. Star (\*\*\*) indicates significant difference (t-test  $p$ -value < 0.001) between two type of cells.

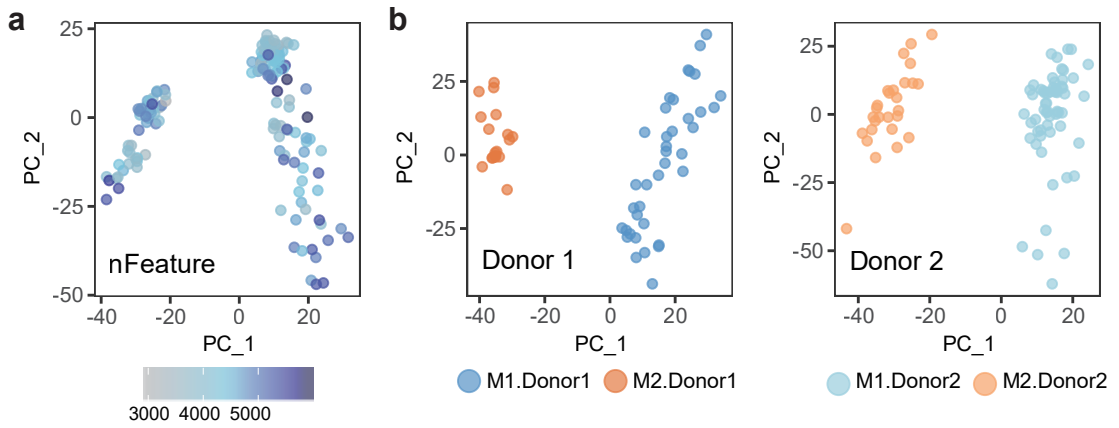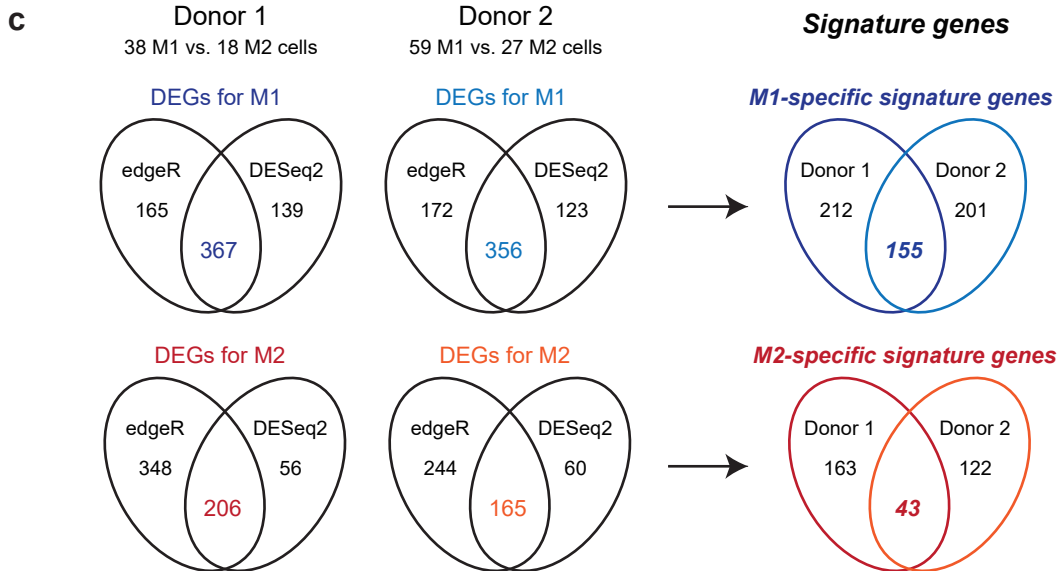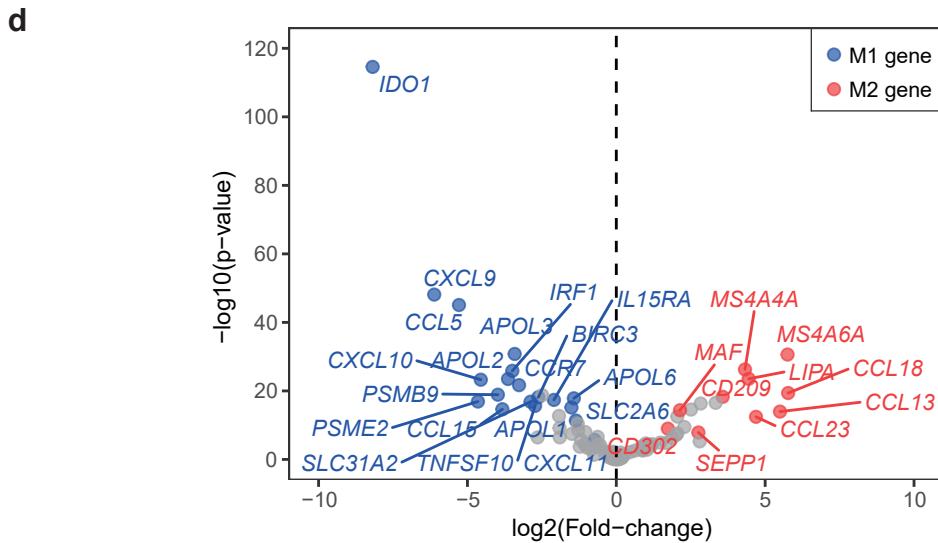

**Supplementary Fig. 4. Extraction of single-cell transcriptome derived M1- and M2-signature.** **a** tSNE plot colored by nFeatures shows no quality difference among samples and clusters. **b** tSNE plots of cells from each donor. **c** Strategy for extracting M1- and M2-signature genes from two donors using two algorithms (edgeR and DESeq2). **d** The 29 validated genes of the published gene set show a significant difference in expression between M1 and M2 single-cells ( $p\text{-value} < 1e5$ ). The x-axis indicates a  $\log_2$ -fold-change in the average expression of M1 and M2 single-cells and the y-axis is a negative  $\log_{10}$  of the p-value obtained by a Student's t-test.

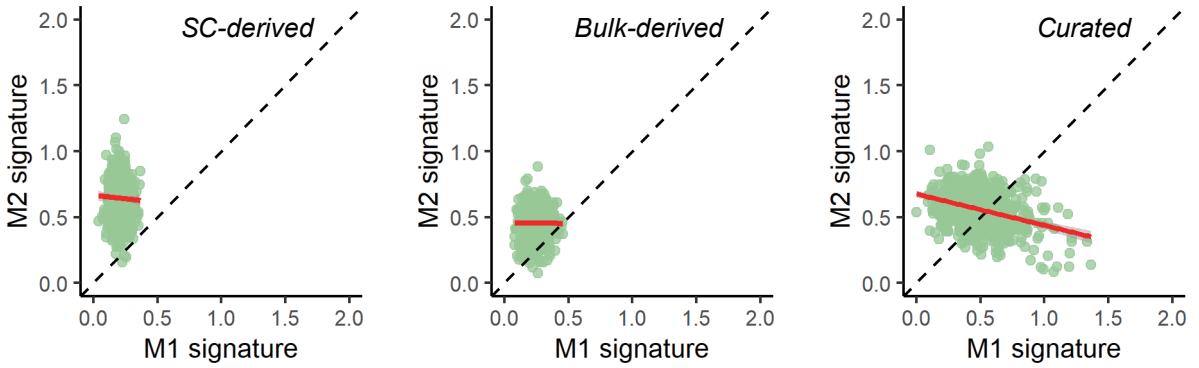

**Supplementary Fig. 5. M2-ness of macrophages from malignant ascites of AGC04 (AGC04A) using massively parallel droplet-based method.** Two-dimensional dot plots for M1-M2 signature evaluation using three different gene sets; single-cell transcriptome-derived signatures (left), bulk transcriptome-derived signatures (middle), and curated signatures (right). The x-axis for M1-signature and y-axis for M2-signature.

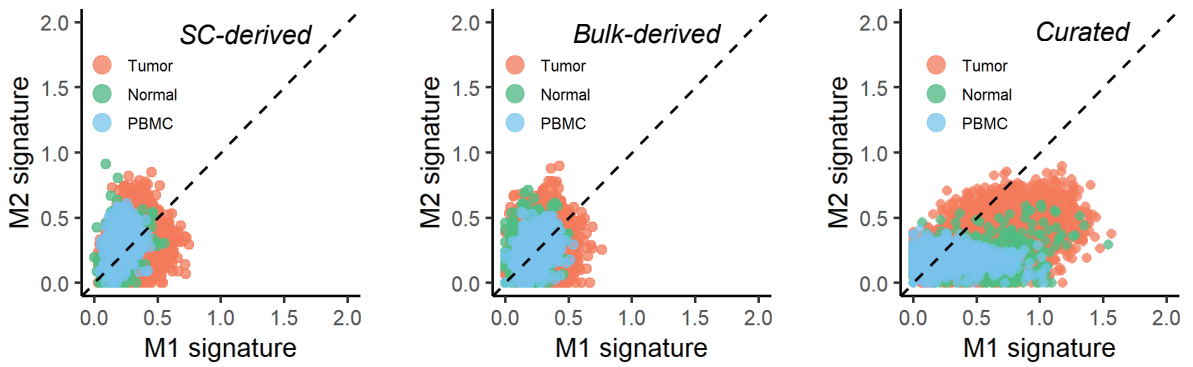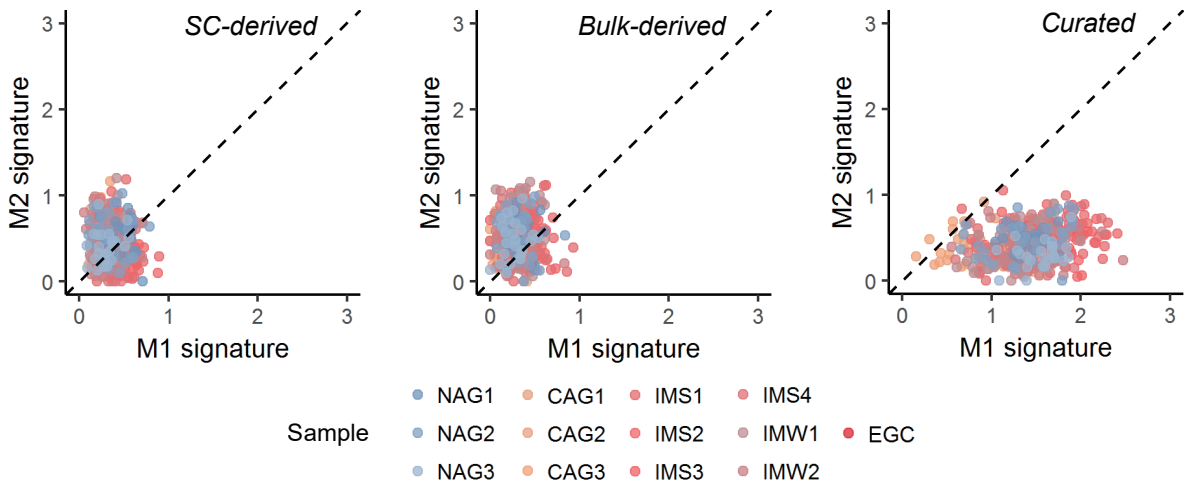

**Supplementary Fig. 6. M1-M2 signature of macrophages in stomach tissues. a**

M1-M2 signature 2-D plots of TAM in gastric cancer tissues shows modest of M2-ness. Public single cell RNA-seq data for gastric cancer tissues, matched normal tissues, and matched PBMC data<sup>19</sup> were analyzed. Each cell was color annotated with their origin of sample. **b** M1-M2 signature 2-D plot of macrophages in non-malignant gastric tissues (NAG, CAG, IM) or early gastric cancer<sup>20</sup>. Each cell was color annotated by sample. NAG, non-atrophic gastritis; CAG, chronic atrophic gastritis; IM, intestinal metaplasia; EGC, early gastric cancer. M1-M2 signature were estimated using three different gene sets; single-cell transcriptome-derived signatures (left), bulk transcriptome-derived signatures (middle), and curated signatures (right).

**a.** Benjamin Izar *et al.*, Nature Medicine (2020) - GSE146026, SMART-seq2

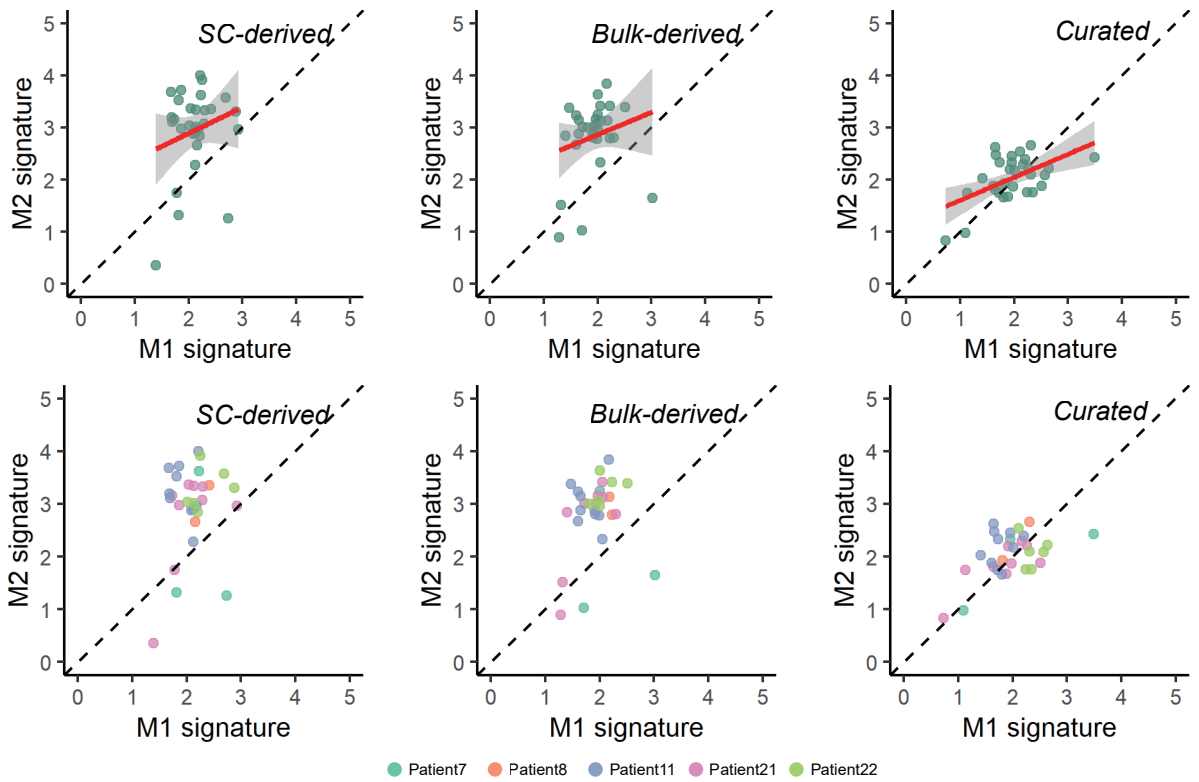

**b.** Benjamin Izar *et al.*, Nature Medicine (2020) - GSE146026, 10x

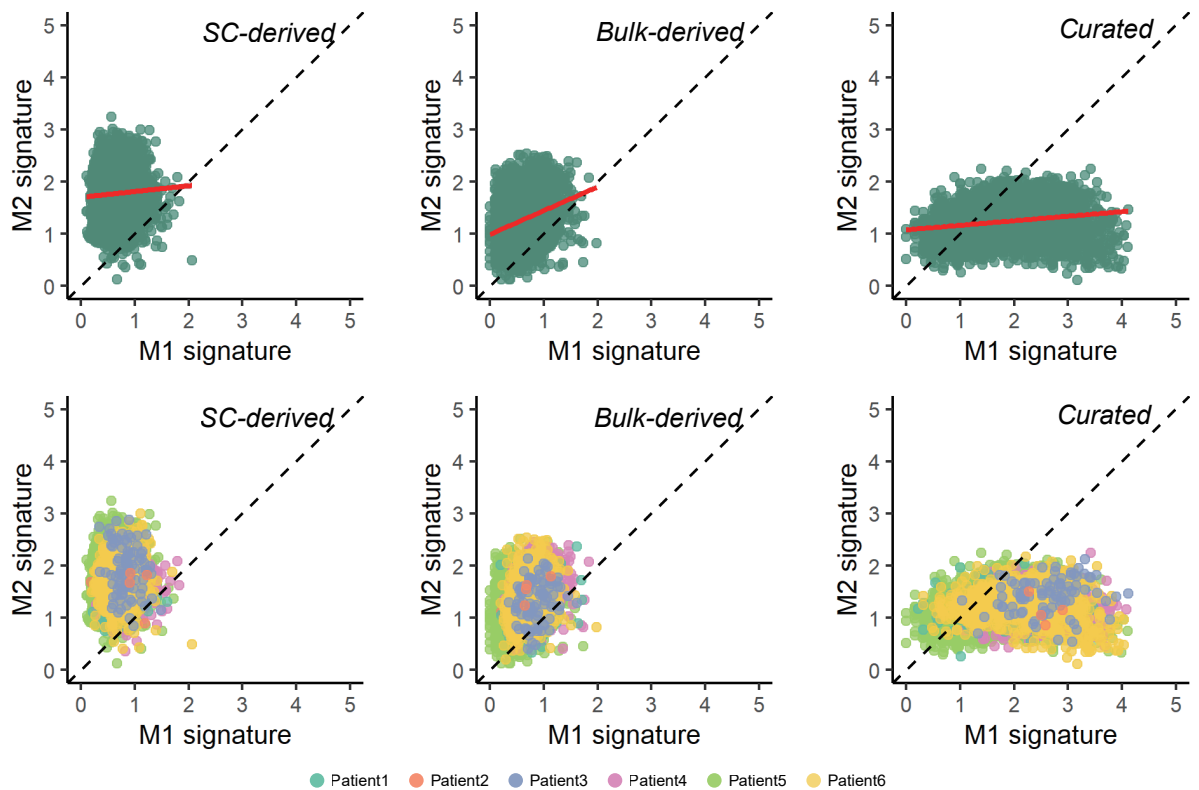



**Supplementary Fig. 7. M2-ness of TAM in malignant ascites of ovarian cancer. a** M1-M2 signature 2-D plots of TAM in malignant ascites of ovarian cancer<sup>21</sup> using SMART-seq2 data. M1-M2 signature were estimated using three different gene sets; single-cell transcriptome-derived signatures (left), bulk transcriptome-derived signatures (middle), and curated signatures (right). The red line represents the simple linear regression line, and the gray area represents the confidence interval (top). Each cell in the bottom panel is color annotated with a sample. **b** M1-M2 signature 2-D plots of TAM in malignant ascites of ovarian cancer using 10x data.

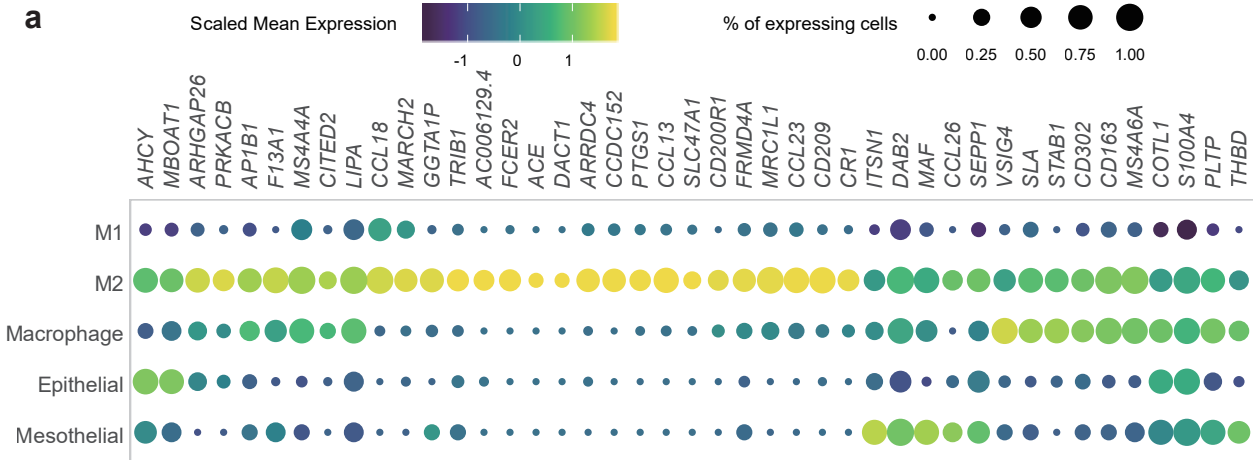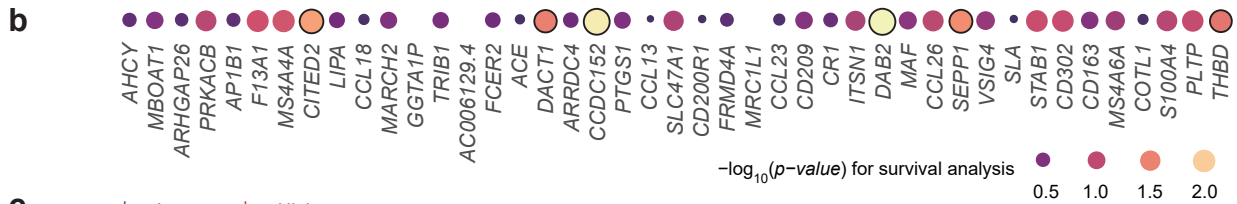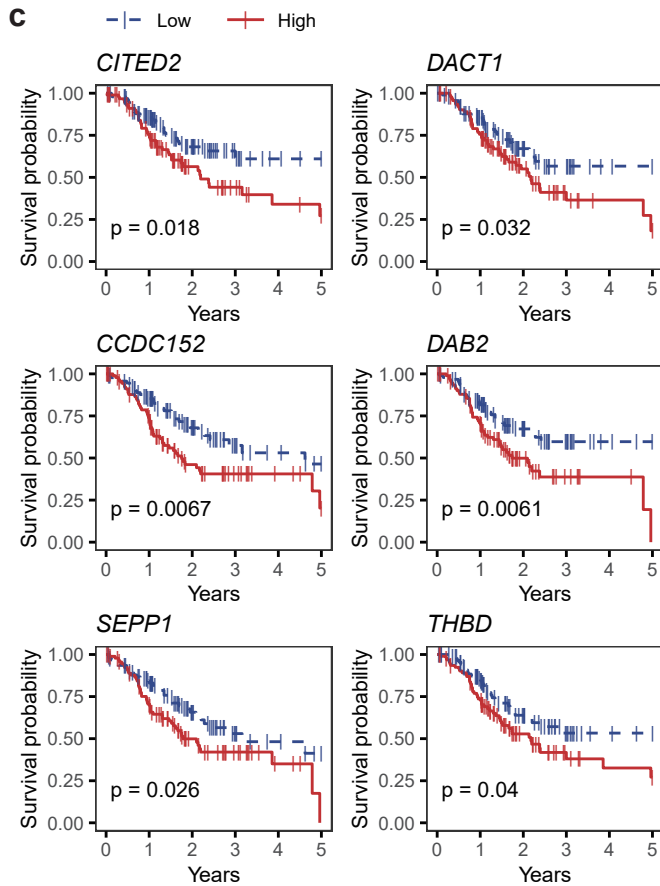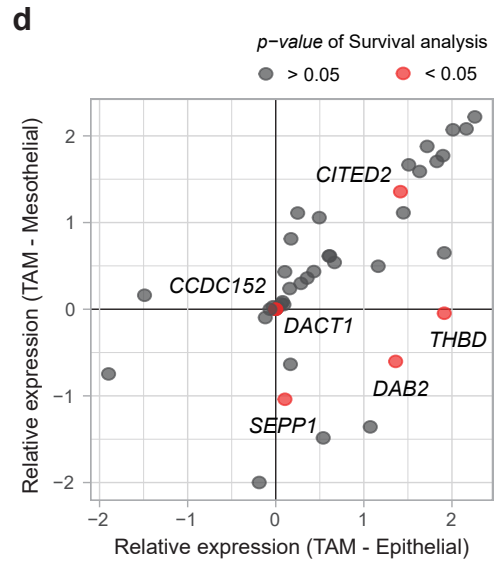

**Supplementary Fig. 8. Prediction of survival rate in TCGA STAD using the M2-signature genes.** **a** Bubble plot for 43 genes of single-cell derived M2-signature per cell type. M1, reference M1; M2, reference M2; Macrophage, TAM of GC; Epithelial, epithelial cancer cells of GC; Mesothelial, mesothelial cells of GC. **b** Overall survival prediction of the single-cell derived M2-signature genes using the TCGA STAD dataset (n = 378). After Kaplan-Meier analysis, significance was represented by a negative log<sub>10</sub> of p-value obtained through a log-rank test. Six genes with significance (*p*-value < 0.05) were marked with black circle. **c** Survival plot of six genes which show significant difference in Kaplan-Meier analysis. p indicates p-value of log-rank test. **d** Relative expression of 43 genes in TAM compared to epithelial or mesothelial cells. The x-axis or y-axis indicate the relative expression levels in TAM compared to epithelial or mesothelial cells, respectively.

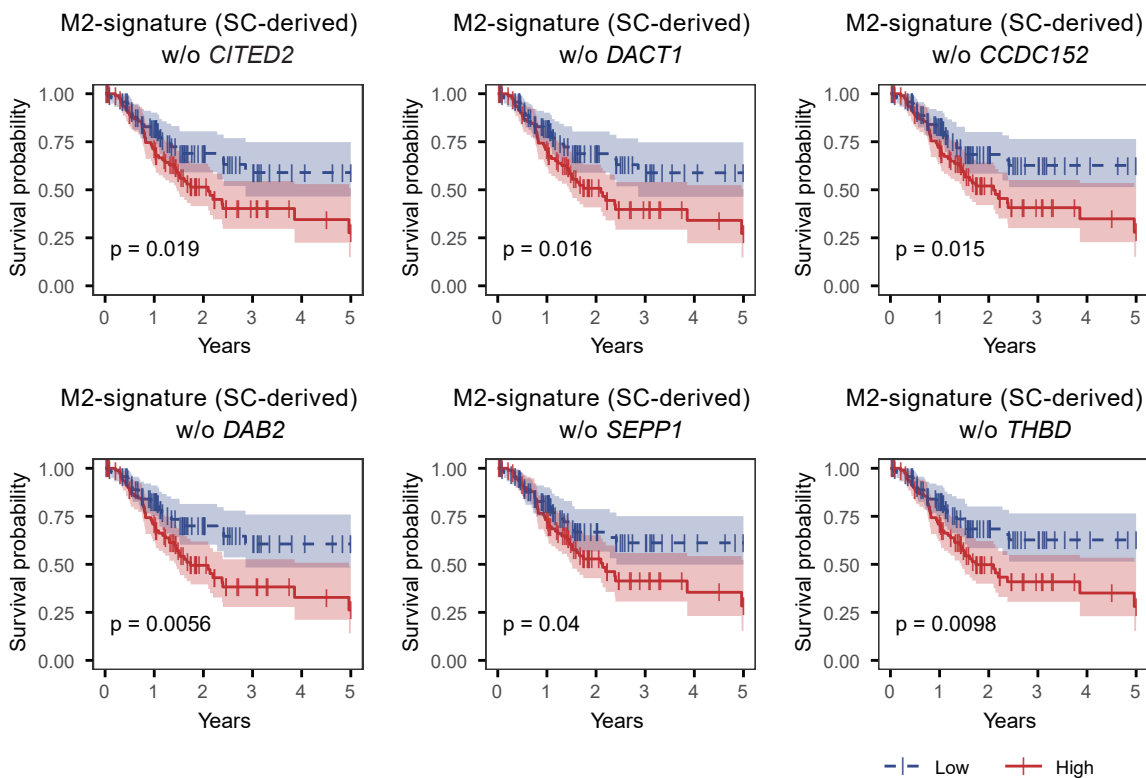

**Supplementary Fig. 9. Robustness of survival predictive power using the M2-signature.** Single-cell derived M2 signature genes, except *CITED2*, *DACT1*, *CCDC152*, *DAB2*, *SEPP1*, or *THBD*, still have significance in predicting survival.  $p$  indicates  $p$ -value of log-rank test.

## Supplementary Table 1. Ligand-receptor pair collections

### a. Chemokine-related

| Pair.Name    | Ligand | Receptor | Annotation                | Reference        | Pair.Source   |
|--------------|--------|----------|---------------------------|------------------|---------------|
| CSF1_CSF1R   | CSF1   | CSF1R    | Growth Factor             | PMID 24202395    | PMID 26198319 |
| EGF_CAV1     | EGF    | CAV1     | Growth Factor             | PMID 24202395    | PMID 26198319 |
| EGF_EGFR     | EGF    | EGFR     | Growth Factor             | PMID 24202395    | PMID 26198319 |
| EGF_ERBB2    | EGF    | ERBB2    | Growth Factor             | PMID 24202395    | PMID 26198319 |
| EGF_ERBB3    | EGF    | ERBB3    | Growth Factor             | PMID 24202395    | PMID 26198319 |
| EGF_ERBB4    | EGF    | ERBB4    | Growth Factor             | PMID 24202395    | PMID 26198319 |
| EGF_FSHR     | EGF    | FSHR     | Growth Factor             | PMID 24202395    | PMID 26198319 |
| TGFB1_ACVRL1 | TGFB1  | ACVRL1   | Growth Factor             | PMID 24202395    | PMID 26198319 |
| TGFB1_CAV1   | TGFB1  | CAV1     | Growth Factor             | PMID 24202395    | PMID 26198319 |
| TGFB1_CD109  | TGFB1  | CD109    | Growth Factor             | PMID 24202395    | PMID 26198319 |
| TGFB1_CXCR4  | TGFB1  | CXCR4    | Growth Factor             | PMID 24202395    | PMID 26198319 |
| TGFB1_ENG    | TGFB1  | ENG      | Growth Factor             | PMID 24202395    | PMID 26198319 |
| TGFB1_ITGAV  | TGFB1  | ITGAV    | Growth Factor             | PMID 24202395    | PMID 26198319 |
| TGFB1_ITGB6  | TGFB1  | ITGB6    | Growth Factor             | PMID 24202395    | PMID 26198319 |
| TGFB1_ITGB8  | TGFB1  | ITGB8    | Growth Factor             | PMID 24202395    | PMID 26198319 |
| TGFB1_SDC2   | TGFB1  | SDC2     | Growth Factor             | PMID 24202395    | PMID 26198319 |
| TGFB1_TGFBR1 | TGFB1  | TGFBR1   | Growth Factor             | PMID 24202395    | PMID 26198319 |
| TGFB1_TGFBR2 | TGFB1  | TGFBR2   | Growth Factor             | PMID 24202395    | PMID 26198319 |
| TGFB1_TGFBR3 | TGFB1  | TGFBR3   | Growth Factor             | PMID 24202395    | PMID 26198319 |
| TGFB2_ACVR1  | TGFB2  | ACVR1    | Growth Factor             | PMID 24202395    | PMID 26198319 |
| TGFB2_ENG    | TGFB2  | ENG      | Growth Factor             | PMID 24202395    | PMID 26198319 |
| TGFB2_TGFBR1 | TGFB2  | TGFBR1   | Growth Factor             | PMID 24202395    | PMID 26198319 |
| TGFB2_TGFBR2 | TGFB2  | TGFBR2   | Growth Factor             | PMID 24202395    | PMID 26198319 |
| TGFB2_TGFBR3 | TGFB2  | TGFBR3   | Growth Factor             | PMID 24202395    | PMID 26198319 |
| TGFB3_ACVRL1 | TGFB3  | ACVRL1   | Growth Factor             | PMID 24202395    | PMID 26198319 |
| TGFB3_ENG    | TGFB3  | ENG      | Growth Factor             | PMID 24202395    | PMID 26198319 |
| TGFB3_TGFBR1 | TGFB3  | TGFBR1   | Growth Factor             | PMID 24202395    | PMID 26198319 |
| TGFB3_TGFBR2 | TGFB3  | TGFBR2   | Growth Factor             | PMID 24202395    | PMID 26198319 |
| TGFB3_TGFBR3 | TGFB3  | TGFBR3   | Growth Factor             | PMID 24202395    | PMID 26198319 |
| CCL2_CCR2    | CCL2   | CCR2     | Cytokine                  | PMID 24202395    | PMID 26198319 |
| CXCL5_CXCR2  | CXCL5  | CXCR2    | Monocyte recruiting       | PMID 24202395    | PMID 26198319 |
| TNF_LTBR     | TNF    | LTBR     | Pro-inflammatory cytokine | PMID 24202395    | PMID 26198319 |
| TNF_SLC5A11  | TNF    | SLC5A11  | Pro-inflammatory cytokine | PMID 24202395    | PMID 26198319 |
| TNF_TNFRSF1A | TNF    | TNFRSF1A | Pro-inflammatory cytokine | PMID 24202395    | PMID 26198319 |
| TNF_TNFRSF1B | TNF    | TNFRSF1B | Pro-inflammatory cytokine | PMID 24202395    | PMID 26198319 |
| TNF_TNFRSF21 | TNF    | TNFRSF21 | Pro-inflammatory cytokine | PMID 24202395    | PMID 26198319 |
| TNF_TRAF2    | TNF    | TRAF2    | Pro-inflammatory cytokine | PMID 24202395    | PMID 26198319 |
| IFNG_IFNGR1  | IFNG   | IFNGR1   | Pro-inflammatory cytokine | Interferon gamma | PMID 26198319 |
| IFNG_IFNGR2  | IFNG   | IFNGR2   | Pro-inflammatory cytokine | Interferon gamma | PMID 26198319 |
| IL1A_IL1R1   | IL1A   | IL1R1    | Pro-inflammatory cytokine | Interleukins     | PMID 26198319 |
| IL1A_IL1R2   | IL1A   | IL1R2    | Pro-inflammatory cytokine | Interleukins     | PMID 26198319 |
| IL1A_IL1RAP  | IL1A   | IL1RAP   | Pro-inflammatory cytokine | Interleukins     | PMID 26198319 |
| IL1B_ADRB2   | IL1B   | ADRB2    | Pro-inflammatory cytokine | Interleukins     | PMID 26198319 |

|               |        |         |                            |               |               |
|---------------|--------|---------|----------------------------|---------------|---------------|
| IL1B_IL1R1    | IL1B   | IL1R1   | Pro-inflammatory cytokine  | Interleukins  | PMID 26198319 |
| IL1B_IL1R2    | IL1B   | IL1R2   | Pro-inflammatory cytokine  | Interleukins  | PMID 26198319 |
| IL1B_IL1RAP   | IL1B   | IL1RAP  | Pro-inflammatory cytokine  | Interleukins  | PMID 26198319 |
| IL6_F3        | IL6    | F3      | Pro-inflammatory cytokine  | Interleukins  | PMID 26198319 |
| IL6_IL6R      | IL6    | IL6R    | Pro-inflammatory cytokine  | Interleukins  | PMID 26198319 |
| IL6_IL6ST     | IL6    | IL6ST   | Pro-inflammatory cytokine  | Interleukins  | PMID 26198319 |
| IL12A_CD28    | IL12A  | CD28    | Pro-inflammatory cytokine  | Interleukins  | PMID 26198319 |
| IL12A_IL12RB1 | IL12A  | IL12RB1 | Pro-inflammatory cytokine  | Interleukins  | PMID 26198319 |
| IL12A_IL12RB2 | IL12A  | IL12RB2 | Pro-inflammatory cytokine  | Interleukins  | PMID 26198319 |
| IL12B_IL12RB1 | IL12B  | IL12RB1 | Pro-inflammatory cytokine  | Interleukins  | PMID 26198319 |
| IL12B_IL12RB2 | IL12B  | IL12RB2 | Pro-inflammatory cytokine  | Interleukins  | PMID 26198319 |
| IL12B_IL23R   | IL12B  | IL23R   | Pro-inflammatory cytokine  | Interleukins  | PMID 26198319 |
| IL4_CD53      | IL4    | CD53    | Anti-inflammatory cytokine | Interleukins  | PMID 26198319 |
| IL4_IL13RA1   | IL4    | IL13RA1 | Anti-inflammatory cytokine | Interleukins  | PMID 26198319 |
| IL4_IL13RA2   | IL4    | IL13RA2 | Anti-inflammatory cytokine | Interleukins  | PMID 26198319 |
| IL4_IL2RG     | IL4    | IL2RG   | Anti-inflammatory cytokine | Interleukins  | PMID 26198319 |
| IL4_IL4R      | IL4    | IL4R    | Anti-inflammatory cytokine | Interleukins  | PMID 26198319 |
| IL5_CSF2RB    | IL5    | CSF2RB  | Anti-inflammatory cytokine | Interleukins  | PMID 26198319 |
| IL5_IL5RA     | IL5    | IL5RA   | Anti-inflammatory cytokine | Interleukins  | PMID 26198319 |
| IL9_IL2RG     | IL9    | IL2RG   | Anti-inflammatory cytokine | Interleukins  | PMID 26198319 |
| IL9_IL9R      | IL9    | IL9R    | Anti-inflammatory cytokine | Interleukins  | PMID 26198319 |
| IL10_IL10RA   | IL10   | IL10RA  | Anti-inflammatory cytokine | Interleukins  | PMID 26198319 |
| IL10_IL10RB   | IL10   | IL10RB  | Anti-inflammatory cytokine | Interleukins  | PMID 26198319 |
| IL10_SIRPG    | IL10   | SIRPG   | Anti-inflammatory cytokine | Interleukins  | PMID 26198319 |
| IL13_IL13RA1  | IL13   | IL13RA1 | Anti-inflammatory cytokine | Interleukins  | PMID 26198319 |
| IL13_IL13RA2  | IL13   | IL13RA2 | Anti-inflammatory cytokine | Interleukins  | PMID 26198319 |
| IL13_IL2RG    | IL13   | IL2RG   | Anti-inflammatory cytokine | Interleukins  | PMID 26198319 |
| IL13_IL4R     | IL13   | IL4R    | Anti-inflammatory cytokine | Interleukins  | PMID 26198319 |
| CSF1_CSF1R    | CSF1   | CSF1R   | Monocyte recruiting        | PMID 28241846 | PMID 28241846 |
| CCL20_CCR6    | CCL20  | CCR6    | Monocyte recruiting        | PMID 28241846 | PMID 28241846 |
| CXCL12_CXCR4  | CXCL12 | CXCR4   | Monocyte recruiting        | PMID 28241846 | PMID 28241846 |
| CCL18_PITPNM3 | CCL18  | PITPNM3 | Monocyte recruiting        | PMID 28241846 | PMID 28241846 |
| CSF1_CSF1R    | CSF1   | CSF1R   | Cytokine                   | PMID 28241846 | PMID 28241846 |
| CCL2_CCR2     | CCL2   | CCR2    | Cytokine                   | PMID 28241846 | PMID 28241846 |
| IL4_IL4R      | IL4    | IL4R    | Macrophage polarization    | PMID 28241846 | PMID 28241846 |
| IL10_IL10RA   | IL10   | IL10RA  | Macrophage polarization    | PMID 28241846 | PMID 28241846 |
| IL10_IL10RB   | IL10   | IL10RB  | Macrophage polarization    | PMID 28241846 | PMID 28241846 |
| CCL2_CCR1     | CCL2   | CCR1    | Macrophage polarization    | PMID 28241846 | PMID 28241846 |
| CCL2_CCR10    | CCL2   | CCR10   | Macrophage polarization    | PMID 28241846 | PMID 28241846 |
| CCL2_CCR2     | CCL2   | CCR2    | Macrophage polarization    | PMID 28241846 | PMID 28241846 |
| CCL2_CCR3     | CCL2   | CCR3    | Macrophage polarization    | PMID 28241846 | PMID 28241846 |
| CCL2_CCR4     | CCL2   | CCR4    | Macrophage polarization    | PMID 28241846 | PMID 28241846 |
| CCL2_CCR5     | CCL2   | CCR5    | Macrophage polarization    | PMID 28241846 | PMID 28241846 |
| CCL3_CCR1     | CCL3   | CCR1    | Macrophage polarization    | PMID 28241846 | PMID 28241846 |
| CCL3_CCR3     | CCL3   | CCR3    | Macrophage polarization    | PMID 28241846 | PMID 28241846 |
| CCL3_CCR4     | CCL3   | CCR4    | Macrophage polarization    | PMID 28241846 | PMID 28241846 |
| CCL3_CCR5     | CCL3   | CCR5    | Macrophage polarization    | PMID 28241846 | PMID 28241846 |

|               |       |         |                         |               |               |
|---------------|-------|---------|-------------------------|---------------|---------------|
| CCL14_CCR1    | CCL14 | CCR1    | Macrophage polarization | PMID 28241846 | PMID 28241846 |
| CCL14_CCR3    | CCL14 | CCR3    | Macrophage polarization | PMID 28241846 | PMID 28241846 |
| CCL14_CCR5    | CCL14 | CCR5    | Macrophage polarization | PMID 28241846 | PMID 28241846 |
| TGFB1_TGFBR1  | TGFB1 | TGFBR1  | Metastasis              | PMID 28241846 | PMID 28241846 |
| TGFB1_TGFBR2  | TGFB1 | TGFBR2  | Metastasis              | PMID 28241846 | PMID 28241846 |
| TGFB1_TGFBR3  | TGFB1 | TGFBR3  | Metastasis              | PMID 28241846 | PMID 28241846 |
| TGFB2_TGFBR1  | TGFB2 | TGFBR1  | Metastasis              | PMID 28241846 | PMID 28241846 |
| TGFB2_TGFBR2  | TGFB2 | TGFBR2  | Metastasis              | PMID 28241846 | PMID 28241846 |
| TGFB2_TGFBR3  | TGFB2 | TGFBR3  | Metastasis              | PMID 28241846 | PMID 28241846 |
| TGFB3_TGFBR1  | TGFB3 | TGFBR1  | Metastasis              | PMID 28241846 | PMID 28241846 |
| TGFB3_TGFBR2  | TGFB3 | TGFBR2  | Metastasis              | PMID 28241846 | PMID 28241846 |
| TGFB3_TGFBR3  | TGFB3 | TGFBR3  | Metastasis              | PMID 28241846 | PMID 28241846 |
| CCL18_PITPNM3 | CCL18 | PITPNM3 | Metastasis              | PMID 28241846 | PMID 28241846 |

**b. Macrophage-related**

| Ligands | Receptors |
|---------|-----------|
| CSF1    | CSF1R     |
| CCL2    | CCR1      |
| CCL3    | CCR2      |
| CCL4    | CCR5      |
| CCL20   | CCR6      |
| CD274   | PDCD1     |
| IL4     | IL4R      |
| IL10    | IL10RA    |
| EGF     | EGFR      |
| TGFB1   | TGFBR1    |
| TGFB2   | TGFBR2    |
| TGFB3   | TGFBR3    |
| TNF     | ACVRL1    |
| IL1B    | ACVR1     |
| IL6     | TNFRSF1A  |
| IFNG    | TNFRSF1B  |
|         | IL1R1     |
|         | IL1R2     |
|         | IL6R      |
|         | IL6ST     |
|         | IFNGR1    |
|         | IFNGR2    |

**Supplementary Table 2. Differentially expressed gene lists for M1 and M2**

| geneset       | SC-derived_M1 | SC-derived_M2 | Bulk-derived_M1                        | Bulk-derived_M2                        | Curated_M1                    | Curated_M2                    |
|---------------|---------------|---------------|----------------------------------------|----------------------------------------|-------------------------------|-------------------------------|
| source        | new           | new           | Martinez FO et al.<br>J Immunol (2006) | Martinez FO et al.<br>J Immunol (2006) | Azizi E et al.<br>Cell (2018) | Azizi E et al.<br>Cell (2018) |
| gene          |               |               |                                        |                                        |                               |                               |
| ADAMDEC1      | AC006129.4    | CCR7          | P2RY13                                 | NOS2                                   | ARG1                          |                               |
| ADORA2A       | ACE           | IL2RA         | LPAR6                                  | IL12A                                  | ARG2                          |                               |
| AIM2          | AHCY          | IL15RA        | TGFBR2                                 | IL12B                                  | IL10                          |                               |
| ALCAM         | AP1B1         | IL7R          | HRH1                                   | FCGR1A                                 | CD32                          |                               |
| ANKRD22       | ARHGAP26      | CXCL11        | TLR5                                   | FCGR2A                                 | CD163                         |                               |
| APOL1         | ARRDC4        | CCL19         | CD302                                  | FCGR3A                                 | FCER2                         |                               |
| APOL2         | CCDC152       | CXCL10        | MSR1                                   | CD80                                   | CD200R1                       |                               |
| APOL3         | CCL13         | CXCL9         | CXCR4                                  | CXCR10                                 | PDCD1LG2                      |                               |
| APOL4         | CCL18         | TNF           | CLEC7A                                 | IL23A                                  | CD274                         |                               |
| APOL6         | CCL23         | CCL5          | P2RY14                                 | CXCL9                                  | MARCO                         |                               |
| ARID5B        | CCL26         | CCL15         | CD209                                  | CXCL10                                 | CSF1R                         |                               |
| B4GALT5       | CD163         | IL12B         | CLEC4F                                 | CXCL11                                 | MRC1                          |                               |
| BIRC3         | CD200R1       | IL15          | MS4A6A                                 | CD86                                   | IL1RN                         |                               |
| BTG1          | CD209         | TNFSF10       | CD36                                   | IL1A                                   | IL1R2                         |                               |
| BTN3A2        | CD302         | IL6           | MS4A4A                                 | IL1B                                   | IL4R                          |                               |
| C15orf48      | CITED2        | CCL20         | MRC1                                   | IL6                                    | CCL4                          |                               |
| C1R           | COTL1         | NAMPT         | IGF1                                   | TNF                                    | CCL13                         |                               |
| C1RL          | CR1           | TYMP          | CCL23                                  | CCL5                                   | CCL20                         |                               |
| C1S           | DAB2          | BCL2A1        | CCL18                                  | IRF5                                   | CCL17                         |                               |
| C5orf15       | DACT1         | FAS           | CCL13                                  | IRF1                                   | CCL18                         |                               |
| CCL15         | F13A1         | BIRC3         | SLCO2B1                                | CD40                                   | CCL22                         |                               |
| CCL5          | FCER2         | GADD45G       | SLC4A7                                 | IDO1                                   | CCL24                         |                               |
| CCR7          | FRMD4A        | XAF1          | SLC38A6                                | KYNU                                   | LYVE1                         |                               |
| CD38          | GGTA1P        | SLC7A5        | CTSC                                   | CCR7                                   | VEGFA                         |                               |
| CD82          | ITSN1         | SLCO5A1       | HEXB                                   | HLA-DMA                                | VEGFB                         |                               |
| CDK14         | LIPA          | SLC2A6        | LIPA                                   | HLA-DMB                                | VEGFC                         |                               |
| CLEC4E        | MAF           | SLC31A2       | ADK                                    | HLA-DOA                                | FIGF                          |                               |
| CLIC4         | MARCH2        | IDO1          | HNMT                                   | HLA-DOB                                | EGF                           |                               |
| CLU           | MBOAT1        | PLA1A         | TPST2                                  | HLA-DPA1                               | CTSA                          |                               |
| CREBRF        | MRC1L1        | OASL          | CERK                                   | HLA-DPB1                               | CTSB                          |                               |
| CSF2RB        | MS4A4A        | CHI3L2        | HS3ST2                                 | HLA-DQA1                               | CTSC                          |                               |
| CTD-2319I12.1 | MS4A6A        | HSD11B1       | LTA4H                                  | HLA-DQA2                               | CTSD                          |                               |
| CUL1          | PLTP          | AK3           | CA2                                    | HLA-DQB1                               | TGFB1                         |                               |
| CXCL10        | PRKACB        | SPHK1         | ALOX15                                 | HLA-DQB2                               | TGFB2                         |                               |
| CXCL11        | PTGS1         | PFKFB3        | HS3ST1                                 | HLA-DQB3                               | TGFB3                         |                               |
| CXCL9         | S100A4        | PSME2         | TGFB1                                  | HLA-DRA                                | MMP14                         |                               |
| CYP27B1       | SEPP1         | PFKP          | SEPP1                                  | HLA-DRB1                               | MMP19                         |                               |
| DAPP1         | SLA           | PSMB9         | CHN2                                   | HLA-DRB5                               | MMP9                          |                               |
| DUSP5         | SLC47A1       | PSMA2         | FN1                                    |                                        | CLEC7A                        |                               |
| EBI3          | STAB1         | OAS2          | FGL2                                   |                                        | WNT7b                         |                               |
| EDEM1         | THBD          | PTX3          | GAS7                                   |                                        | FASLG                         |                               |
| ENTPD1        | TRIB1         | VCAN          | EGR2                                   |                                        | TNFSF12                       |                               |
| EPSTI1        | VSIG4         | APOL3         | MAF                                    |                                        | TNFSF8                        |                               |



EREG  
ETV7  
FAM26F  
FAM49A  
GBP1  
GBP1P1  
GBP2  
GBP4  
GBP5  
GCH1  
GGH  
GPR157  
HAPLN3  
HCP5  
HIST2H4A  
HIST2H4B  
HS3ST3B1  
IDO1  
IDO2  
IFI44L  
IFIT2  
IFIT3  
IFITM1  
IL15RA  
IL2RG  
IL32  
IL3RA  
IRF1  
IRG1  
ISG20  
ITGB8  
ITPRIPL2  
KYNU  
LAMP3  
LATS2  
LGALS17A  
LILRB4  
LPAR6  
LRRK2  
LY75  
LYZ  
MAGED2  
MEFV  
MGST1  
MMP25  
MT1E  
MT1F

IGFBP4  
APOL1  
PDGFA  
EDN1  
APOL2  
INHBA  
APOL6  
HESX1  
IRF1  
ATF3  
IRF7

CD276  
VTCN1  
MSR1  
FN1  
IRF4

|               |  |  |  |  |  |
|---------------|--|--|--|--|--|
| MT1G          |  |  |  |  |  |
| MT1H          |  |  |  |  |  |
| MT1L          |  |  |  |  |  |
| MT1M          |  |  |  |  |  |
| MT1X          |  |  |  |  |  |
| MT2A          |  |  |  |  |  |
| NBN           |  |  |  |  |  |
| NCF1          |  |  |  |  |  |
| NEURL3        |  |  |  |  |  |
| NFKB1         |  |  |  |  |  |
| NLRC5         |  |  |  |  |  |
| NUB1          |  |  |  |  |  |
| NUPR1         |  |  |  |  |  |
| PARP14        |  |  |  |  |  |
| PDE4B         |  |  |  |  |  |
| PDPN          |  |  |  |  |  |
| PLA2G7        |  |  |  |  |  |
| PLAUR         |  |  |  |  |  |
| PNRC1         |  |  |  |  |  |
| PPA1          |  |  |  |  |  |
| PPM1K         |  |  |  |  |  |
| PSMB8         |  |  |  |  |  |
| PSMB9         |  |  |  |  |  |
| PSME2         |  |  |  |  |  |
| PSME2P2       |  |  |  |  |  |
| PSTPIP2       |  |  |  |  |  |
| PTGES         |  |  |  |  |  |
| RARRES3       |  |  |  |  |  |
| RHBDF2        |  |  |  |  |  |
| RP11-1143G9.4 |  |  |  |  |  |
| RP11-274E7.2  |  |  |  |  |  |
| RP11-44K6.4   |  |  |  |  |  |
| RSAD2         |  |  |  |  |  |
| SCO2          |  |  |  |  |  |
| SEC22B        |  |  |  |  |  |
| SELM          |  |  |  |  |  |
| SERPING1      |  |  |  |  |  |
| SIPA1L1       |  |  |  |  |  |
| SLAMF7        |  |  |  |  |  |
| SLC1A2        |  |  |  |  |  |
| SLC1A3        |  |  |  |  |  |
| SLC1A4        |  |  |  |  |  |
| SLC2A6        |  |  |  |  |  |
| SLC31A2       |  |  |  |  |  |
| SLC7A11       |  |  |  |  |  |
| SNX10         |  |  |  |  |  |
| SOD2          |  |  |  |  |  |

|          |  |  |  |  |  |
|----------|--|--|--|--|--|
| STAT4    |  |  |  |  |  |
| STX11    |  |  |  |  |  |
| TAP1     |  |  |  |  |  |
| TAP2     |  |  |  |  |  |
| TMEM140  |  |  |  |  |  |
| TMEM38B  |  |  |  |  |  |
| TNFAIP3  |  |  |  |  |  |
| TNFAIP6  |  |  |  |  |  |
| TNFRSF9  |  |  |  |  |  |
| TNFSF10  |  |  |  |  |  |
| TNFSF13B |  |  |  |  |  |
| TRIM64EP |  |  |  |  |  |
| TXN      |  |  |  |  |  |
| UBD      |  |  |  |  |  |
| USP11    |  |  |  |  |  |
| WARS     |  |  |  |  |  |
| WTAP     |  |  |  |  |  |
| XPNPEP1  |  |  |  |  |  |
